# Supplementary material for: Phomaketide A Inhibits Lymphangiogenesis in Human Lymphatic Endothelial Cells
Source: PubMed Central journal article supplement (PMC6520718; doi:10.3390/md17040215), 2019-04-06
Supplement: marinedrugs-17-00215-s001.pdf [file marinedrugs-17-00215-s001.pdf]

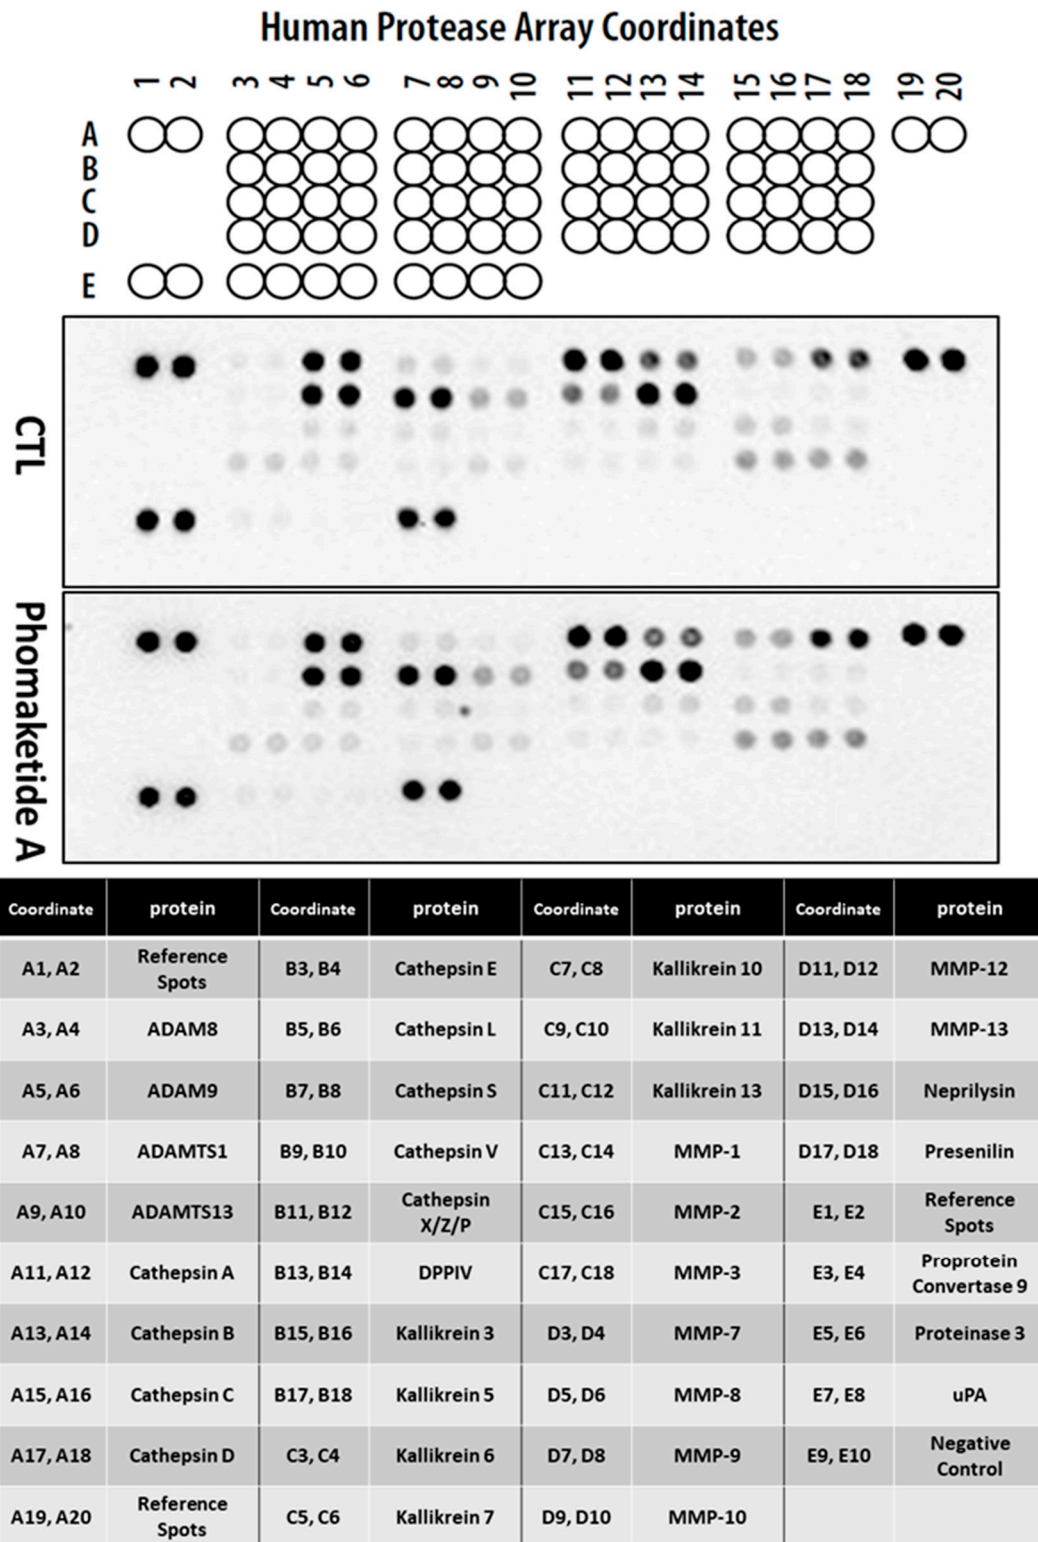

**Suppl. Figure.1** Effect of phomaketide A on the expression profile of proteases in human LECs. LECs were treated with phomaketide A (20  $\mu$ M) for 8 h, subsequently total cell lysates were collected to detect the relative levels of protease using human protease array. The relative expression and coordinate of 35 human proteases are shown.

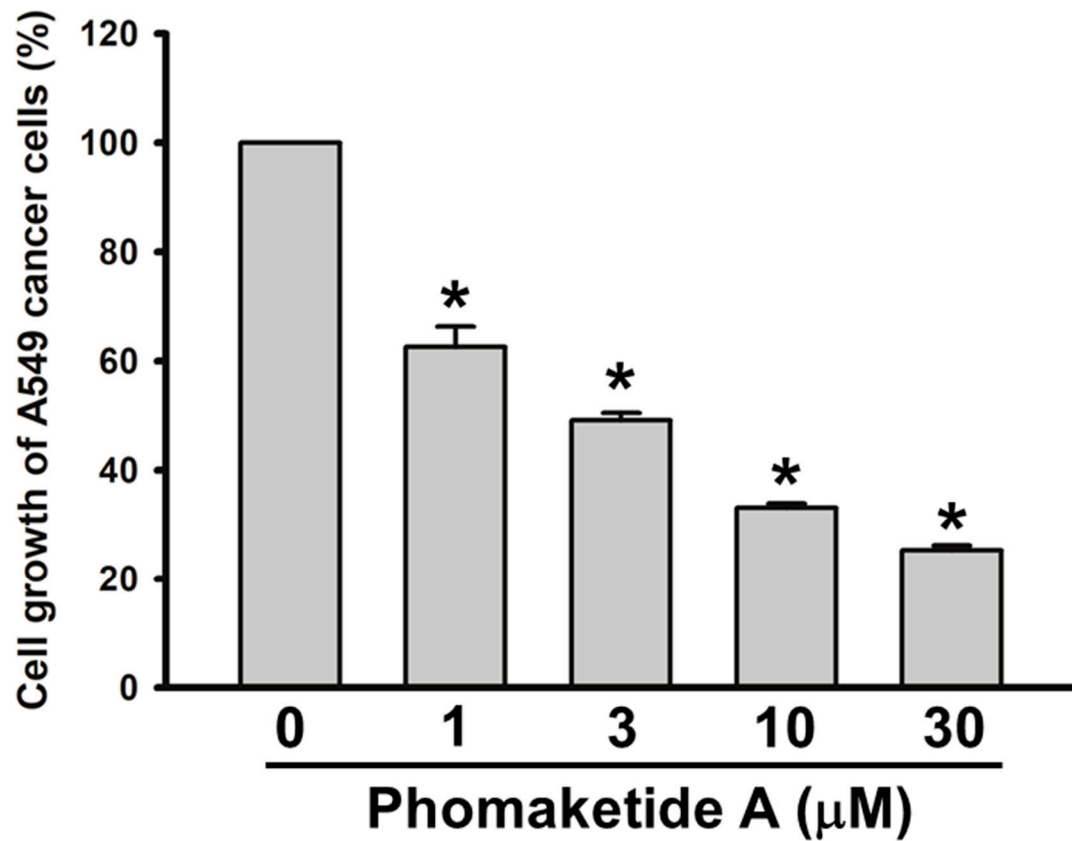

**Suppl. Figure.2** Effect of phomaketide A on cell growth of A549 cancer cells. Cells were treated with the indicated concentrations of phomaketide A for 48 h, and anti-cancer activity was determined using cell growth assay. Data are expressed as the mean  $\pm$  SEM of three independent experiments. \*  $p < 0.05$ , compared with the control group.
